# Supplementary material
Source: publisher figshare collection journal article supplement (https://future-science-group.figshare.com/ndownloader/files/20023634)
Supplement: Supplementary file 1 [file 20023634]

**Supplementary Table 1**. A comparison of HiVE with published Urine RNA extraction methods.

| Method | Urine Volume ≥10 ml | RNA extraction time ≤90 min | Advantages | Disadvantages | Refs |
| --- | --- | --- | --- | --- | --- |
| HiVE | Yes | Yes | No EV selection, high yields, high volume, cost effective, also harvests sRNA. |  |  |
| Ultracentrifugation | Yes | 2.5 – 16 hours depending on speed | With the right equipment can extract 30 ml. | Selective: vesicles on density. Misses ~14 % of EVs, expensive equipment, time consuming set up. | [1,2] |
| Sucrose density gradient ultracentrifugation | Yes | 4 hours to two days | With the right equipment can extract 30 ml. | Selective: vesicles on density. Expensive equipment, time consuming set up. | [3,4] |
| Microfiltration | Yes | >2 hours | Easily implementable. | Selective: vesicles >100kDa. Costly filter units, filter blockages, misses 40% of cfRNA. | [5,6] |
| Hydrostatic dialysis plus ultracentrifugation | 5 ml | >4 hours | Collects EVs missed by ultracentrifugation alone. | Expensive equipment, time consuming set up. | [7,8] |
| Vn-peptide, New England Peptide™ | Yes | Yes | Simple. | Selective: Binds EV Heat shock protein surface antigen on vesicles. Costly. | [9,10] |
| ExoQuick | 250 µl | 12 hour precipitation |  | Selective: precipitates vesicles with a proprietary polymer. Small volume. | [11,12] |
| MagNA Pure | 1 ml | >2 hours | No Selection. | Small volume. | [13,14] |
| Qiagen RNeasy | 600 µl | Yes | No Selection. | Small volume. | [5,15] |
| Norgen Slurry | Yes | >2 hours | Also harvests sRNA. | Selective: binds EVs. Difficult to cleanly separate slurry from liquid after binding. | [16,17] |
| Norgen Column | 700 µl | Yes | Also harvests sRNA. | Selective: binds EVs. Low volume – larger 10 ml version is costly. Multiple re-pipetting flow-through onto same column. | [18,19] |

**References for Supplementary Table 1**

- 1. Théry C, Amigorena S, Raposo G, Clayton A. Isolation and characterization of exosomes from cell culture supernatants and biological fluids. *Curr. Protoc. Cell Biol.* 30(1), 3.22.1-3.22.29 (2006)
- 2. Tataruch-Weinert D, Musante L, Kretz O, Holthofer H. Urinary extracellular vesicles for RNA extraction: optimization of a protocol devoid of prokaryote contamination. *J. Extracell. Vesicles* 5(1) (2016)
- 3. Tauro BJ, Greening DW, Mathias RA, et al. Comparison of ultracentrifugation, density gradient separation, and immunoaffinity capture methods for isolating human colon cancer cell line LIM1863-derived exosomes. *Methods* 56(2), 293–304 (2012)
- 4. Salih M, Zietse R, Hoorn EJ. Urinary extracellular vesicles and the kidney: biomarkers and beyond. *Am. J. Physiol. Renal Physiol*. 306 (11),1251–1259 (2014)
- 5. Miranda KC, Bond DT, McKee M, et al. Nucleic acids within urinary exosomes/microvesicles are potential biomarkers for renal disease. *Kidney Int.* 78(2), 191–199 (2010).
- 6. Lobb RJ, Becker M, Wen SW, et al. Optimized exosome isolation protocol for cell culture supernatant and human plasma. *J. Extracell. Vesicles.* 4(1), doi:[10.3402/jev.v4.27031](https://doi.org/10.3402/jev.v4.27031) (2015)
- 7.Tataruch-Weinert D, Musante L, Kretz O, Holthofer H. Urinary extracellular vesicles for RNA extraction: optimization of a protocol devoid of prokaryote contamination. *J. Extracell. Vesicles*. 5(1), doi: [10.3402/jev.v5.30281](https://doi.org/10.3402/jev.v5.30281) (2016)
- 8. Musante L, Tataruch DE, Holthofer H. Use and isolation of urinary exosomes as biomarkers for diabetic nephropathy. *Front. Endocrinol.* 5(149) (2014)
- 9. Ghosh A, Davey M, Chute IC, et al. Rapid isolation of extracellular vesicles from cell culture and biological fluids using a synthetic peptide with specific affinity for heat shock proteins. *PLoS One* 9(10), e110443 (2014)
- 10. Bijnsdorp I V, Maxouri O, Kardar A, et al. Feasibility of urinary extracellular vesicle proteome profiling using a robust and simple, clinically applicable isolation method. *J. Extracell. Vesicles* 6(1) (2017)
- 11. Helwa I, Cai J, Drewry MD, et al. A comparative study of serum exosome isolation using differential ultracentrifugation and three commercial reagents. *PLoS One* 12(1), 1–22 (2017)
- 12. Andreu Z, Rivas E, Sanguino-Pascual A, et al. Comparative analysis of EV isolation procedures for miRNAs detection in serum samples. *J. Extracell. Vesicles* 5, 31655 (2016)
- 13. Esona MD, McDonald S, Kamili S, Kerin T, Gautam R, Bowen MD. Comparative evaluation of commercially available manual and automated nucleic acid extraction methods for rotavirus RNA detection in stools. *J. Virol. Methods.* 194(1–2), 242–249 (2013)
- 14. Hessels D, de Jong H, Jannink SA, et al. Analytical validation of an mRNA-based urine test to predict the presence of high-grade prostate cancer. *Transl. Med. Commun.* 2(1), 5 (2017)
- 15. Valadi H, Ekström K, Bossios A, Sjöstrand M, Lee JJ, Lötvall JO. Exosome-mediated transfer of mRNAs and microRNAs is a novel mechanism of genetic exchange between cells. *Nat. Cell Biol.* 9(6), 654–659 (2007)
- 16. Bebelman MP, Smit MJ, Pegtel DM, Baglio SR. Biogenesis and function of extracellular vesicles in cancer. *Pharmacol. Ther.* 188, 1–11 (2018)
- 17. Lin SY, Linehan JA, Wilson TG, Hoon DSB. Emerging utility of urinary cell-free nucleic acid biomarkers for prostate, bladder, and renal cancers. *Eur. Urol. Focus* 3(2–3), 265–272 (2017)
- 18. Cheng L, Sun X, Scicluna BJ, Coleman BM, Hill AF. Characterization and deep sequencing analysis of exosomal and non-exosomal miRNA in human urine. *Kidney Int.* 86(2), 433–444 (2014)
- 19. Butz H, Nofech-Mozes R, Ding Q, et al. Exosomal microRNAs are diagnostic biomarkers and can mediate cell-cell communication in renal cell carcinoma. *Eur. Urol. Focus*. 2(2), 210–218 (2016)

- **Supplementary Figure 1**. Small RNA size range and yield. A) HiVE small RNA (HiVE-sRNA) yields from 10 urine samples (10ml extracted). B) Example Bioanalyzer trace from one representative sRNA sample. On the x-axis, ‘nt’ stands for nucleotides. The spike at 4nt is an internal standard used in the Bioanalyzer analysis.
